# Supplementary material
Source: publisher figshare collection journal article supplement (https://karger.figshare.com/ndownloader/files/25008359)

Supplemental Table 1: Antibodies information

| **Name** | **Concentration** | **Dilution** | **Catalog** |
| --- | --- | --- | --- |
| Anti Albumin | 20.9 mg/ml | 1/1.000 | Abcam, ab8940 |
| DAPI (4',6-Diamidino-2-Phenylindole (Dapi) | 10mg | 1/100 | Invitrogen, D1306 |
| Anti Collagen type III | 100 µg | 1/100 | Chemicon, AB757P |
| Anti collagen type IV | 100ug | 1/100 | Sigma, C1926 |
| Donkey anti-Sheep IgG (H+L) Secondary Antibody | 1mg | 1/400 | Invitrogen, A11015 |
| HRP-conjugated secondary antibody | 1 mg/1 ml | 1/200 | Zymed, 816520 |

**Supplemental Figure 1: Controls of Cell seeding over the slice of porcine liver matrix.**

(A) light microscopy showing the slice of HepG2 cells used for co-culture. Panel (B) shows HepG2 nuclei staining with DAPI (blue) and albumin (green). In (C), our negative control, sowing the absence of cells in the matrix and in (D) a photomicrography of the negative control, showing the absence of nuclei and albumin marks. Scale bars: 100 µm.


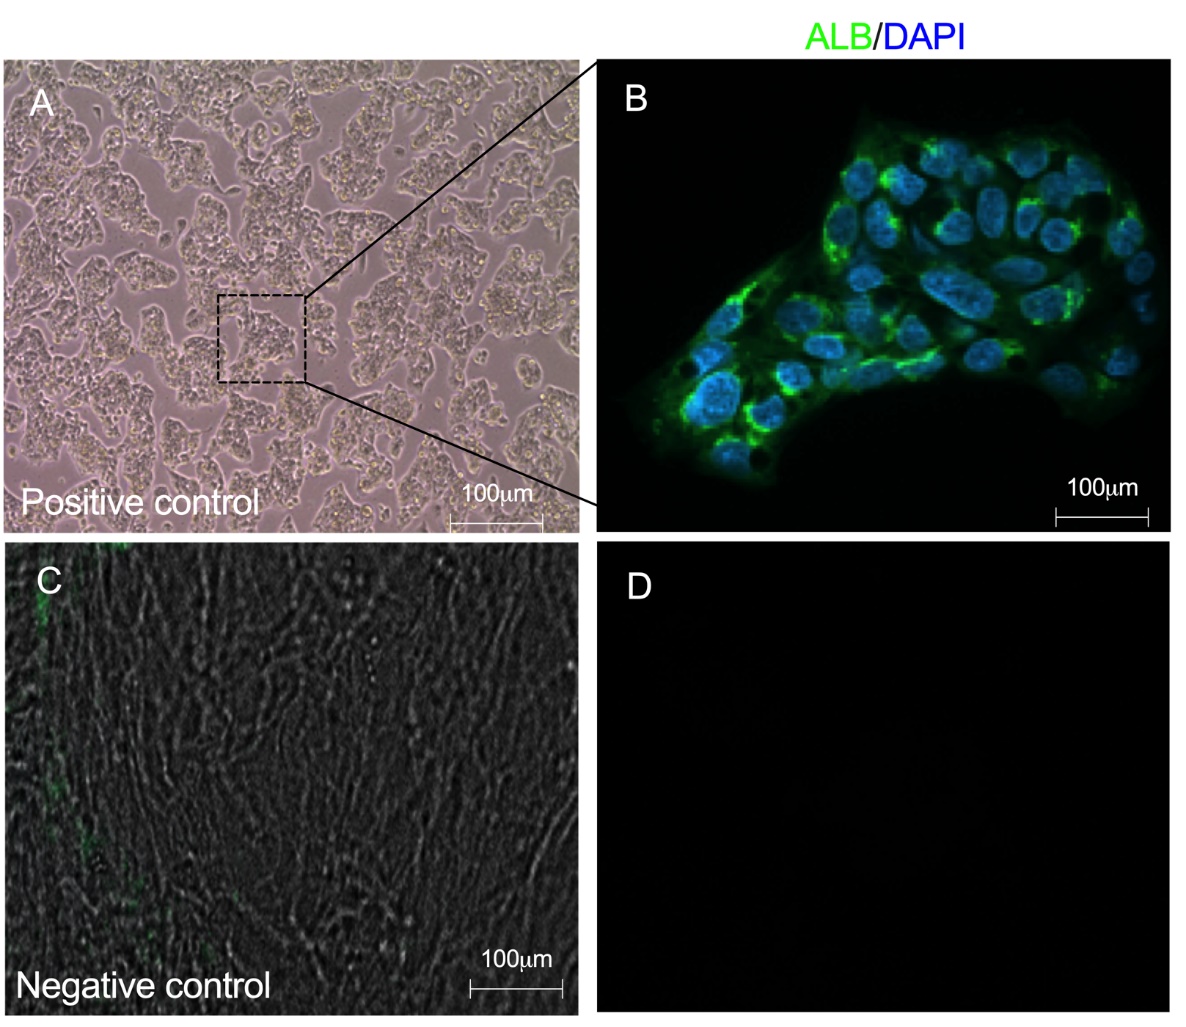

Supplement: Supplementary file 1 [file 25008359]
